# Supplementary material
Source: Elsevier journal article supplement (https://uchicago.cottagelabs.com/records/1zdts-47e55/files/mmc1.pdf)
Supplement: mmc1 [file mmc1.pdf]

# THE LANCET Planetary Health

## Supplementary appendix

This appendix formed part of the original submission and has been peer reviewed. We post it as supplied by the authors.

Supplement to: Trickey K, Hadjimichael N, Sanghavi P. Public reporting of hydraulic fracturing chemicals in the USA, 2011–18: a before and after comparison of reporting formats. *Lancet Planet Health* 2020; **4**: e178–85.

## Supplementary Material

**Supplementary Table 1: Summary of State Reporting Requirements to FracFocus.**

| State in FracFocus | FracFocus Requirement | Law Effective Date | Number of FracFocus version 3.0 Forms | Percent Systems Approach | Percent Withholding |
|--------------------|-----------------------|--------------------|---------------------------------------|--------------------------|---------------------|
| AK                 | Yes                   | Jan. 7, 2015       | 45                                    | 97.8                     | 46.7                |
| AL                 | Yes                   | Aug. 9, 2013       | 1                                     | 0                        | 0                   |
| AR                 | No                    | n/a                | 52                                    | 86.5                     | 80.8                |
| CA                 | Yes                   | Jul. 1, 2015*      | 370                                   | 100                      | 0                   |
| CO                 | Yes                   | Apr. 1, 2012       | 3771                                  | 65.3                     | 88.3                |
| IL                 | No                    | n/a                | 0                                     | n/a                      | n/a                 |
| IN                 | No                    | n/a                | 0                                     | n/a                      | n/a                 |
| KS                 | Allow                 | Dec. 2, 2013       | 49                                    | 4.1                      | 83.7                |
| KY                 | Yes                   | Jun. 24, 2015      | 4                                     | 75                       | 100                 |
| LA                 | Allow                 | Oct. 20, 2011      | 822                                   | 79.3                     | 75.2                |
| MI                 | Yes                   | Mar. 11, 2015      | 8                                     | 25                       | 62.5                |
| MS                 | Allow                 | Mar. 4, 2013       | 27                                    | 51.9                     | 70.4                |
| MT                 | Allow                 | Aug. 26, 2011      | 45                                    | 75.6                     | 31.1                |
| ND                 | Yes                   | Apr. 1, 2012       | 2792                                  | 60.3                     | 91.1                |
| NE                 | Yes                   | Jun. 15, 2014      | 2                                     | 50                       | 50                  |
| NM                 | Yes                   | Feb. 5, 2012       | 1638                                  | 64.3                     | 93.8                |
| NV                 | Yes                   | Oct. 24, 2014      | 0                                     | n/a                      | n/a                 |
| OH                 | Allow                 | Sep. 10, 2012      | 746                                   | 37.9                     | 82.4                |
| OK                 | Yes                   | Jul. 1, 2012       | 3931                                  | 54.1                     | 82.3                |
| PA                 | Yes                   | Apr. 16, 2012      | 1692                                  | 54.1                     | 72.4                |
| SD                 | Yes                   | Apr. 22, 2013      | 1                                     | 100                      | 0                   |
| TX                 | Yes                   | Jan. 2, 2012       | 15616                                 | 48.8                     | 89.1                |
| UT                 | Yes                   | Nov. 1, 2012       | 514                                   | 37.5                     | 76.3                |
| VA                 | Yes                   | Dec. 28, 2016      | 281                                   | 100                      | 49.4                |
| WV                 | Yes                   | Jul. 1, 2013       | 662                                   | 57.6                     | 75.7                |
| WY                 | No                    | n/a                | 1151                                  | 87.1                     | 80.4                |

**Supplementary Table 1 Legend:** States that appear in our dataset are listed along with a characterization of their representation in FracFocus version 3.0. States that have passed laws requiring disclosure to FracFocus are indicated in the “FracFocus Requirement” column, as well as states that allow FracFocus as one of multiple options for chemical disclosure. Law effective dates are also indicated. \*On Jan. 1, 2016, California transitioned away from its FracFocus requirement to its own system.

**Supplementary Figure 1: Empirical Transition Date Between FracFocus versions 2.0 and 3.0.**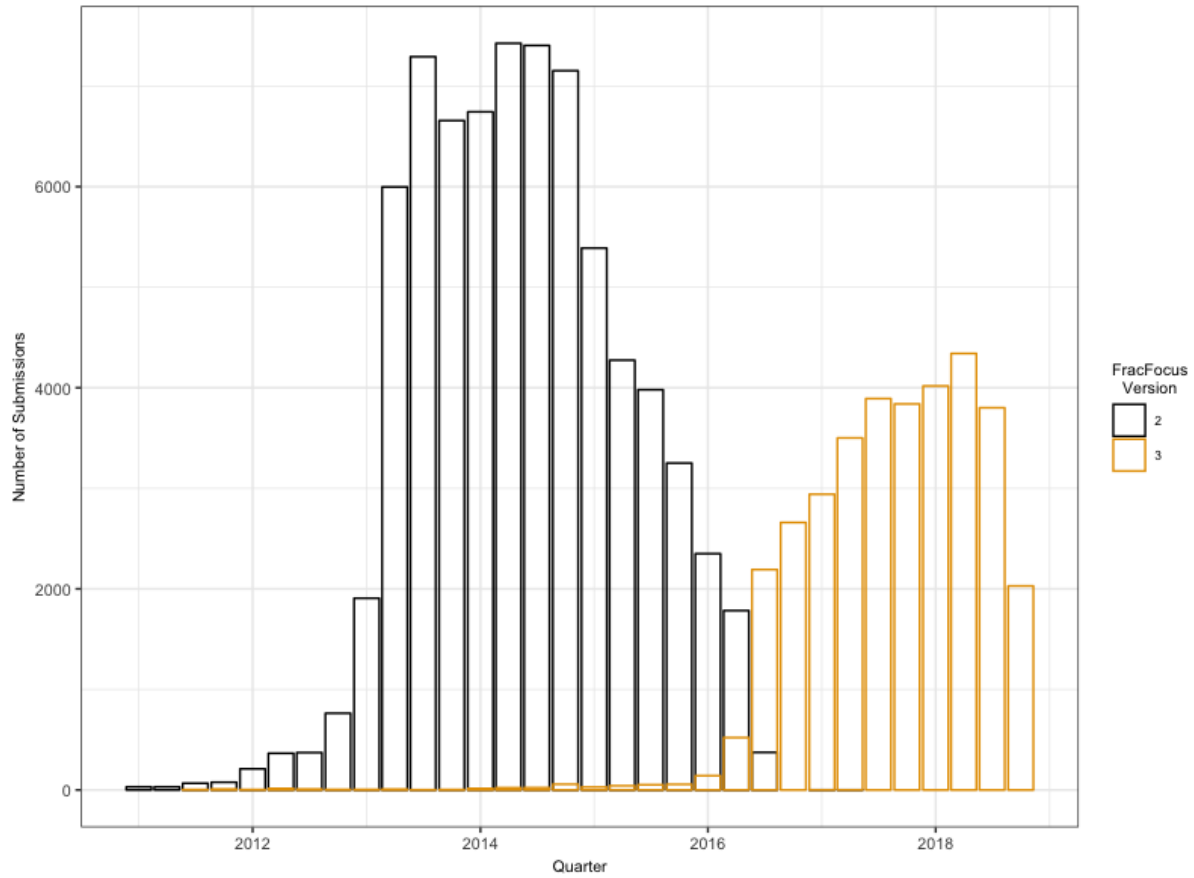

**Supplementary Figure 1 Legend:** Forms were binned by the “JobStartDate” column and plotted along the time axis. April 2016 was confirmed to be the transition date for the majority of submissions between FracFocus version 2.0 (black) and FracFocus version 3.0 (light orange).

**Supplementary Figure 2: FracFocus version 3.0 Wells and Systems Approach Usage**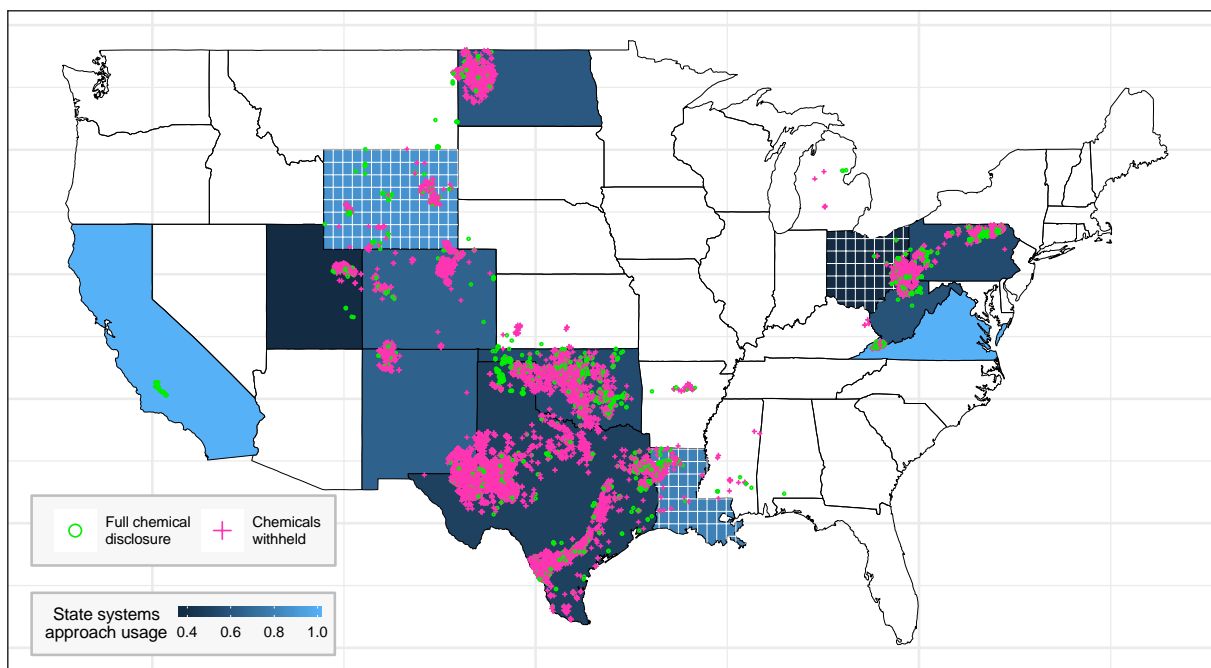

**Supplementary Figure 2 Legend:** Submissions to FracFocus version 3.0 are plotted in magenta crosses if they withhold chemicals (88.7%), and green circles if they have complete disclosure (11.3%). States are colored by their systems approach usage, with lighter shades of blue indicating greater proportions of systems approach forms. States with fewer than 100 FF 3.0 forms were omitted from blue shading. Crosshatched states (Louisiana, Ohio, and Wyoming) are the only colored states that do not legally require submission to FracFocus.
